# Supplementary material for: The Stochastic Ice-Sheet and Sea-Level System Model v1.0 (StISSM v1.0)
Source: Copernicus journal article supplement (doi:10.5194/egusphere-2022-699), 2022-08-08
Supplement: Supplementary file [file egusphere-2022-699-AC3-supplement.pdf]

We thank Reviewer 1 for their interest in our work, and for providing constructive comments and suggestions on the manuscript. We have worked on the comments, and revised the manuscript. We have addressed all the “General comments” of Reviewer 1, and we have followed their suggestion for almost all their “Editorial comments”. This document consists of a point-by-point reply to all the comments. In this document, the comments from Reviewer 1 are in blue, while our responses are in black. New text that has been included in the manuscript is in *black italic*.

A revised version of the manuscript will accompany this response. We will also upload a “tracked changes” version of the manuscript where all the modifications are highlighted. Line numbers in this document refer to line numbers of the revised manuscript without tracked changes.

This paper describes a new feature developed for the Ice-sheet and Sea-level System Model (ISSM), which adds stochastic parameterizations for particular forcings and model parameters. The new model framework is called The Stochastic Ice-Sheet and Sea-Level System Model v1.0 (StISSM v1.0). Overall, the paper is very clear in its structure and explanation of the purpose of the new functionality, an overview of how to use the new functionality, as well as interpretation of some initial experiments that used the new functionality. The authors should be commended for explaining a complicated concept (adding stochasticity to an already existing model framework) in a very clear and straightforward way. Additionally, the paper makes use of existing "standard" ice sheet model setups (e.g., MISMIP+ and IQIS) and makes good connections with prior related literature (e.g., the comparison with Roe and Baker, 2016).

I have some general comments as well as editorial comments further below, amounting to minor revisions needed before resubmission. I will emphasize again that the paper is very well written and presented in a clear manner. The StISSM model will be very impactful for future studies and I am pleased to see this significant step forward in ice sheet modeling.

We thank Reviewer 1 for their interest in our work.

#### General comment 1:

In the introduction, I suggest some additional text to state that, although StISSM will alleviate the need to run large ensembles of climate models if it is possible to correctly parameterize the structure of internal climate variability from other sources of information, such as observations. In this current manuscript draft, the wording in the introduction too strongly claims that StISSM will eliminate the need to run large GCM ensembles. I think there still may be a need, although that need could very well be reduced by StISSM. This will also connect nicely with the discussion text on lines 553-554.

We agree with Reviewer 1. However, significant advances have been made to statistically emulate climate model output based on a relatively small number of GCM runs (e.g., Castruccio and Stein, 2013; Castruccio et al., 2014; Bao et al., 2016). This raises the prospect to use statistical models within ISMs to reproduce the characteristics of climate variability and capture irreducible climatic uncertainty. We have included in the Introduction the reservation about the need to still run GCM ensembles for calibrating such models. We have also added a sentence about the prospect to use simpler statistical models to reproduce output representative of GCM outputs (l 93-98):

*Statistics that determine the magnitude and the spatiotemporal dimensions of variability should be provided by users, and thus constrained from theory, observations or other model simulations (Bassis, 2011; Chylek et al., 2012; Castruccio et al., 2014; Christensen, 2020; Hu and Castruccio, 2021). The latter option shows that StISSM v1.0 does not completely eliminate the need to run large climate model ensembles to constrain climatic variability. However, statistical models can be calibrated to a small number of climate model runs, and implemented in StISSM v1.0, in order to reproduce the characteristics of climate model output (Castruccio and Stein, 2013; Castruccio et al., 2014; Bao et al., 2016).*

#### General comment 2:

In the future, is it planned to add functionality to specify different stochastic time steps for different input variables (if they are uncorrelated)? I suggest adding some text to either the methods or the discussion sections to touch on this.

This is a future development that can be considered. As pointed out in the question, it is not straightforward to implement for correlated variables, because noise terms cannot be generated independently in this case. We have included this prospect in the manuscript (l 169-171):

*At this stage, StISSM v1.0 uses an identical stochastic time step for all variables modeled with additive Gaussian white noise (Eq. (1)), but implementing different stochastic time steps is a possible avenue for future development.*

#### General comment 3:

I suggest making the connection between "y" and "eta" more clear. I think it's good to have two separate symbols to make it clear that one is coming from an autoregressive process. But it would be good to state very explicitly: "At each simulation time step, a value for either y or  $\eta$  is calculated and used for that particular time step and subsequent simulation time steps until the next stochastic update." That wording is a little clunky and can definitely be improved. My suggestion is just to make it clear that "y" and "eta" represent a similar thing: the realization of a random variable that is used as the value for a particular forcing or parameter by ISSM.

We agree with the Reviewer that the difference between y and eta might have been confusing for readers unfamiliar to stochastic process. We now specify the difference between both explicitly before introducing the equation for autoregressive processes (l 213-215):

*We use the notation  $\eta$  to represent a variable governed by a stochastic AR process, in contrast to y, which is governed by an additive Gaussian white noise process (see Eq. (1)).*

In Sect. 2.3, we have also clarified that both y and eta are ISSM variables that are represented as random processes in StISSM v1.0 (l 239-240):

*It should be noted that  $\eta$  (Eq. (7)) and y (Eq. (1)) are both the realization of a random process used as an ISSM variable, with the former being an autoregressive stochastic process and the latter an additive Gaussian white noise process.*

#### General comment 4:

I suggest changing the presentation of the changes in ice mass in Section 4 from showing the initial mass and final mean masses in each ensemble to showing the mean changes in mass. In other words, show just the differences between the initial mass and the final mean masses in Gt, as well as the percent changes (as you have already shown). I don't see the need to show the initial and final masses themselves; the differences will illustrate the results more clearly. This would also make it easier to compare the mean mass change against the deterministic drift in Table 6. Additionally, please change how this is shown in the figures (e.g., Fig 4c, Fig 6c, Fig 8b).

We have updated all the figures, including the box plots, to show the ice mass change. We have also included an additional column in all the Tables of Sect. 4 that shows the total mass change [Gt] in addition to the column showing the relative mass change [%].

#### General comment 5:

The "Code and data availability" section states that "the simulation results, and the scripts to reproduce all the figures are available" on Zenodo. Are the scripts user to initialize, configure, and run the ISSM simulations also available there. The policy states that "preprocessing, run control and postprocessing scripts" and, I do see

postprocessing scripts in the Zenodo archive but I don't see preprocessing and run control scripts. If these are there, please ignore this comment. If they are missing, please provide these in the same Zenodo repository.

The reviewer is correct. The previous Zenodo dataset did not include input files, preprocessing scripts, and run control scripts. We have created a new Zenodo dataset that includes all these files and scripts, in addition to the ensemble results of our study and the python scripts used for the statistical analyses and for making the figures. The run scripts for the deterministic spin-up to steady-state of each experiment are available. In addition, we provide the saved final steady-state files such that the transient ensemble runs can be executed by readers without running the full spin-up again. We have updated the Code and Data availability section (please note that these changes are not highlighted in the “tracked changes” version of the manuscript for some unknown reason) (1 653-655):

*The simulation results, the scripts to reproduce all the figures, the scripts to perform statistical analyses, as well as all the input files, preprocessing, run control, and postprocessing scripts to reproduce the simulations are available as a Zenodo dataset:*

*<https://doi.org/10.5281/zenodo.7144993>*

#### Editorial comments

line 9: Change "of" to "for"

Done

line 29: It'll be a mouthful but I would spell out "CMIP6" here.

Done

line 32: Change "inclusion" to "selection"

Done

lines 82-84: This statement is brought up as motivation for the paper but it's not really addressed: "Finally, climate model simulations are generally not coupled to ISMs, which neglects possible impacts from ice-sheet changes on the climate system, such as surface elevation changes and modified ice discharge into the ocean." I suggest removing this from the intro because it doesn't directly motivate the need for a stochastic ice sheet model. Alternatively, if you'd like to keep it in, I suggest adding discussion text on how StISSM can help address the coupling issue.

We agree with the reviewer and have removed these statements. Please note that the autoregressive SMB scheme allows for a feedback process by using lapse rates. However, this is not necessarily related to the stochastic schemes, and could be implemented in a fully deterministic ISM. For this reason, we have preferred to follow the advice from Reviewer 1 and have removed the statements.

line 96: Possibly change "underline" to "emphasize" for clarity

Done

line 101: Add "The new ..." before the start of this first sentence to make it clear that this is referring to the new stochastic functionality within ISSM and not something that had already existed.

Done

line 106: I might suggest changing "ocean forcing" to "frontal ablation" or something like that. I think of "ocean forcing" as a climatic forcing (i.e., ocean thermal forcing), whereas the way that you convert ocean forcing to frontal melt (via parameterization) is a glaciological process.

Here, we have preferred not to follow the recommendation of Reviewer 1. There are different stochastic schemes related to ocean forcing. First, TF can be represented as an autoregressive process. TF is the temperature above freezing point and thus really represents a climatic forcing in ISSM simulations. Second, ice shelf melt rates can also be represented as an autoregressive process (or as an additive Gaussian white noise process). Ice shelf melt rate is indeed a parameterization of a glaciological process rather than a climatic forcing. Because stochastic variables related to oceanic conditions encompass both “raw” climatic forcing and parameterization of ocean melt, we prefer to use the broad term “ocean forcing” to give an overview of the processes targeted by

stochasticity. We believe that our descriptions in the Methods section make clear which precise variables are modeled as stochastic processes.

lines 347-348: The extrapolation of  $C_B$  is a bit unclear to me. Is this needed because the ice sheet will grow in extent during the transient simulation to get to steady-state? In other words, this is an extrapolation of  $C_B$  beyond the extent of the present-day ice sheet, where there are no ice velocities available to invert for  $C_B$ , correct? Please clarify.

The reviewer is correct that the use of a regression is necessary to infer realistic  $C_B$  values beyond the present-day ice sheet extent. In addition, at the very margins of the ice sheet, ice is thin and observed velocity gradients are large. This can cause spurious unrealistic patterns in  $C_B$  when doing an inversion. Thus, our regression is used to extrapolate  $C_B$  in any area with ice thickness less than 500 m to avoid this problem. We have clarified this in the manuscript (l 372-375):

*We use a linear regression of  $C_B$  on bed elevation to extrapolate the field in areas covered by less than 500 m of ice. This avoids spurious patterns in  $C_B$  in marginal areas where observed velocity gradients are large, and also allows extrapolation of  $C_B$  in ice-free areas where the ice sheet can extend during model simulations.*

line 360: "Free-flow boundary condition" is the same as "Neumann boundary condition", correct? If so, please state this.

Free-flux boundary conditions are not equivalent to Neumann boundary conditions. Instead, it is a boundary condition that allows the ice flux at the boundaries to be adjusted depending on the upstream flux in order to preserve the margin at the same position. Please also note that this approach was used in the ISMIP6 intercomparison experiment (Goelzer et al., 2020). We have clarified our description of the boundary conditions in the manuscript (l 387-388):

*In the first phase, we fix the ice sheet margin positions and implement free-flux boundary conditions at the ice margins, meaning that boundary ice fluxes adjust to incoming fluxes to keep margins fixed in space.*

line 383: I suggest changing "to quantify the minimal amount of deterministic model drift" to "to quantify the amount of deterministic model drift, which is minimal", if that is indeed what is meant here.

Done

Figure 3: Please add ticks and axis labels and also make sure that the axes are equal so that Greenland doesn't appear stretched in one direction or the other.

Done

line 408: Please add a very brief explanation for what the Shapiro-Wilk test signifies and how to interpret the p-value.

Done (l 436-439):

*We use the Shapiro-Wilk test to evaluate if the final ice mass PDFs are consistent with a Normal distribution (Shapiro and Wilk, 1965). This test measures the fit between standard normal quantiles and the ordered and standardized ice mass values of the ensemble. It has also been shown more powerful than many commonly-used normality tests (Razali and Wah, 2011).*

line 410: Please provide support for the statement: "and the PDFs of final glacier state have not yet converged to statistical steady-states." Is this determined by looking at the changes in the PDF statistics (mean, std dev, skew) over the last X years? Please specify.

We now explicitly state that the trends over the last 50 years of the 500-year simulations in both the ensemble mean and the ensemble standard deviation are significant (all p-values are below 0.001 in our experiments). We believe that the existence of a significant trend in the first two moments (mean and variance) of the ensemble results demonstrate that the PDFs have not reached statistical convergence. See l 441-443, l 486-488, and l 529-531.

line 413: Change "combined to" to "due to"

Done

line 570: Would it be fair to make "experiments" more specific by changing to "laboratory experiments"? If so, please make that change.

We now specify (l 608-609):

*(...) values much lower than minimal values from field- and laboratory-derived measurements (...)*

line 593: I suggest elaborating on the statement that stochastic forcing causes "asymmetry in the response." From the experiments presented, it seems to me that there is asymmetry during the transient but that the asymmetry decreases towards the end of each simulation and, as demonstrated by the Shapiro-Wilk p-values, ends up being fairly close to a symmetric normal distribution. If I am misinterpreting, it is because of my lack of familiarity with the Shapiro-Wilk test and that should be addressed in the paper (I have a comment about this above). But if what I wrote is correct, I suggest expanding this conclusion to state something similar to what I have suggested. We agree that the term "asymmetry" is confusing in the way it was previously used. We do not necessarily refer to the final ice mass distribution being asymmetric, but rather that a zero-mean forcing can cause a non-zero-mean response as well as time-varying tendencies in the response of an ice sheet. To avoid confusion related to the term "asymmetry", which readers could associate to the PDFs themselves, we have rephrased this part of the Conclusion (l 632-633):

*(...) stochastic forcing not only causes variability in the final state, but also non-zero tendencies in the response, noise-induced drift, and long timescales needed for ice sheet state convergence.*

Thank you for your constructive comments.  
Vincent Verjans, on behalf of all authors

#### References in this response

- Bao, J., McInerney, D. J., and Stein, M. L.: A spatial-dependent model for climate emulation, *Environmetrics*, 27, 396–408, <https://doi.org/10.1002/env.2412>, 2016.
- Castruccio, S. and Stein, M. L.: Global space-time models for climate ensembles, *Ann. Appl. Stat.*, 7, 1593–1611, <https://doi.org/10.1214/13-AOAS656>, 2013.
- Castruccio, S., McInerney, D. J., Stein, M. L., Crouch, F. L., Jacob, R. L., and Moyer, E. J.: Statistical emulation of climate model projections based on precomputed GCM runs, *J. Climate*, 27, 1829–1844, <https://doi.org/10.1175/JCLI-D-13-00099.1>, 2014.
- Goelzer, H., Nowicki, S., Payne, A., Larour, E., Seroussi, H., Lipscomb, W. H., Gregory, J., Abe-Ouchi, A., Shepherd, A., Simon, E., Agosta, C., Alexander, P., Aschwanden, A., Barthel, A., Calov, R., Chambers, C., Choi, Y., Cuzzone, J., Dumas, C., Edwards, T., Felikson, D., Fettweis, X., Golledge, N. R., Greve, R., Humbert, A., Huybrechts, P., Le clec'h, S., Lee, V., Leguy, G., Little, C., Lowry, D. P., Morlighem, M., Nias, I., Quiquet, A., Rückamp, M., Schlegel, N.-J., Slater, D. A., Smith, R. S., Straneo, F., Tarasov, L., van de Wal, R., and van den Broeke, M.: The future sea-level contribution of the Greenland ice sheet: a multi-model ensemble study of ISMIP6, *The Cryosphere*, 14, 3071–3096, <https://doi.org/10.5194/tc-14-3071-2020>, 2020.
